# Supplementary material for: Annual hydrographic variability in Antarctic coastal waters infused with glacial inflow
Source: Copernicus journal article supplement (doi:10.5194/essd-2022-320), 2022-10-04

Figure 1: All the in-depth profiles performed during our measurements divided by season and zone

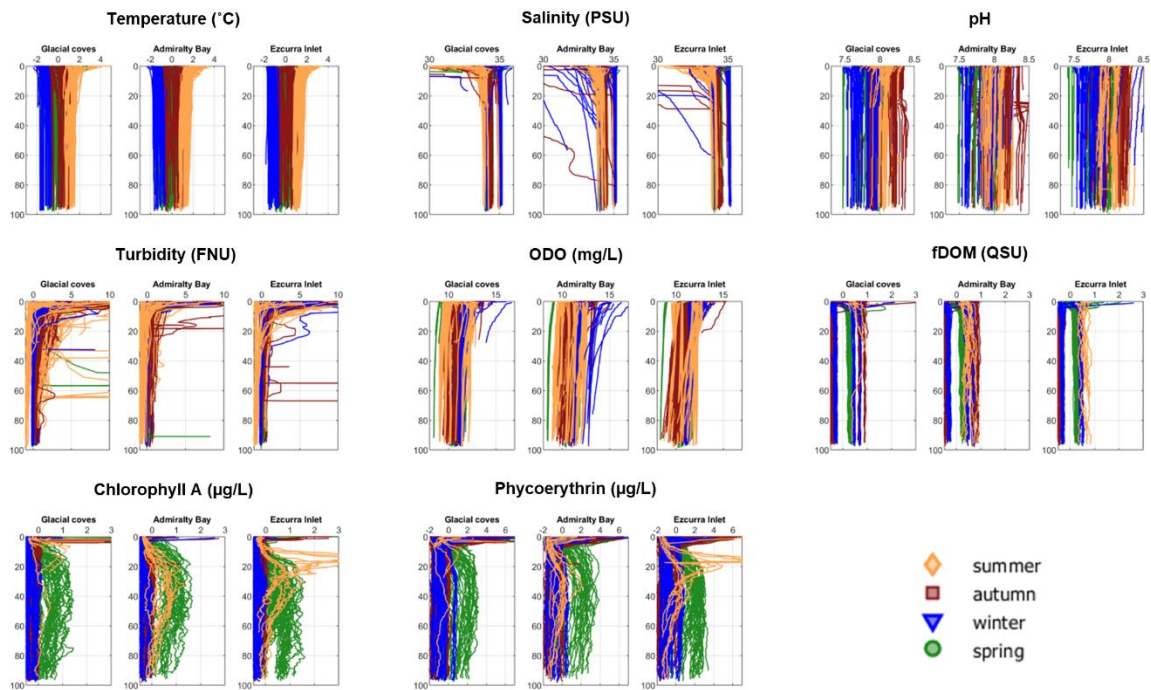

Figure 2: Histogram of values distribution of chlorophyll A, phycoerythrin and fDOM

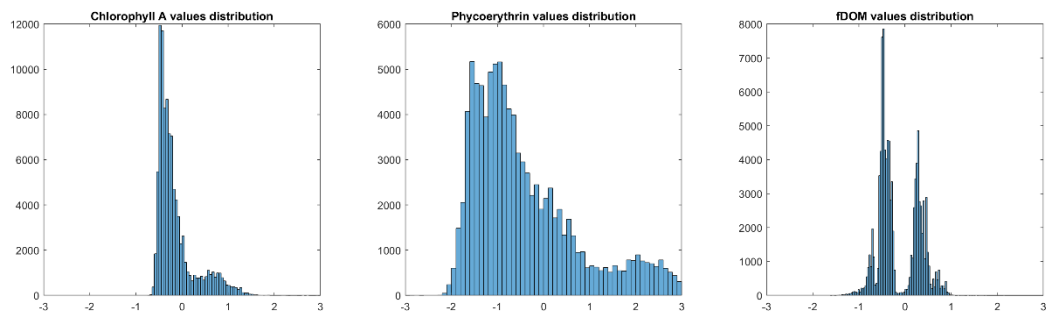

Supplement: Supplementary file [file essd-2022-320-AC2-supplement.pdf]
